# Supplementary material for: InP and Sn:InP based quantum dot sensitized solar cells
Source: Royal Society of Chemistry journal article supplement (doi:10.1039/c5ta04925c), 2015-01-01
Supplement: c5ta04925c1.pdf [file c5ta04925c1.pdf]

## Supporting information

# InP and Sn:InP based quantum dot sensitized solar cells

### Calculation procedure for ligand exchange efficiency:

The ratio of the concentration before ( $C_1$ ) and after ( $C_2$ ) ligand exchange is defined as the exchange efficiency ( $Y_{exchange}$ ).

$$Y_{exchange} = \frac{C_2}{C_1} \times 100\% = \frac{A_2/\varepsilon_2 l_2}{A_1/\varepsilon_1 l_1} \times 100\% \quad (1)$$

Here, A represents the absorbance at the first excitonic absorption peak.  $l$  represents the constants.  $\varepsilon$  is the correlation molar extinction coefficient that is calculated using the empirical functions (2).

$$\varepsilon = 3046.1D^3 - 76532D^2 + (5.5137 \times 10^5)D - 8.9839 \times 10^5 \quad (2)$$

Here, the correlation diameter (D) is calculated using equation (3).

$$D = -3.3307 \times 10^{-12}\lambda^5 + 1.0262 \times 10^{-8}\lambda^4 - 1.0781 \times 10^{-5}\lambda^3 + 5.4550 \times 10^{-3}\lambda^2 - 1.3122\lambda + 119.9 \quad (3)$$

Where,  $\lambda$  represents the first excitonic absorption peak wavelength.

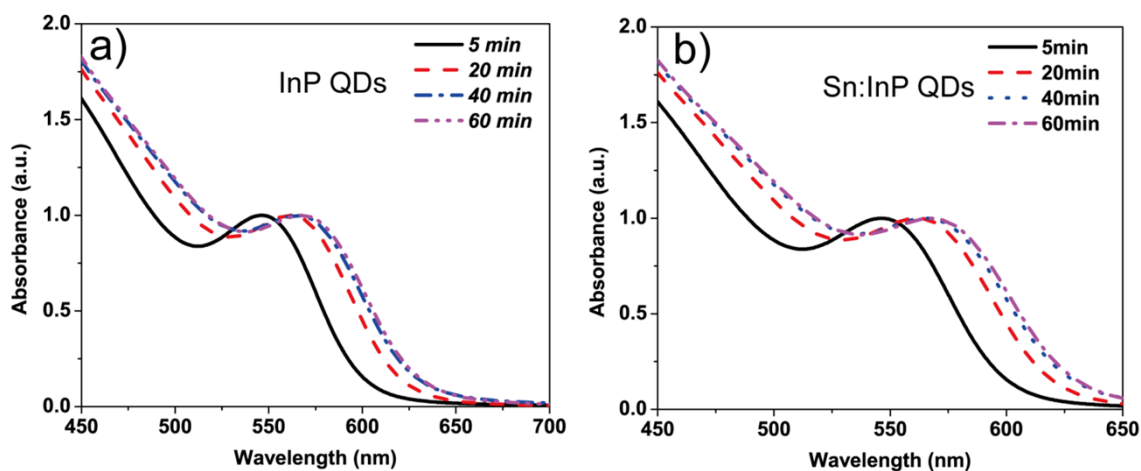

Figure S1. The temporal evolution of UV-vis absorption spectra of a) InP QDs and b) Sn:InP QDs with Sn/In=0.1

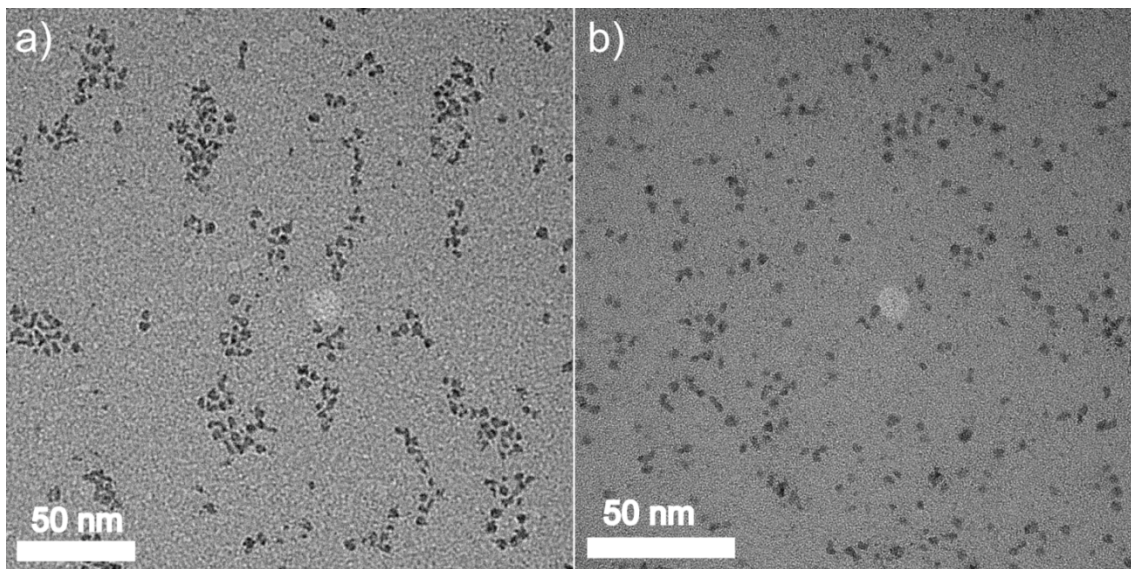

Figure S2. HR-TEM images of a) undoped InP and b) Sn:InP QDs

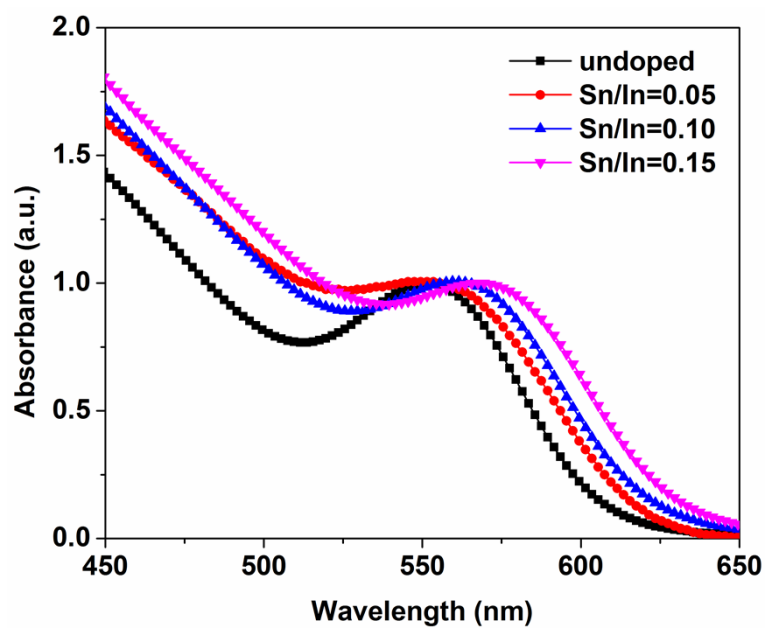

Figure S3 The absorption spectra of undoped InP QDs and Sn doped InP QDs with different Sn/In ratios of 0.05, 0.1 and 0.15

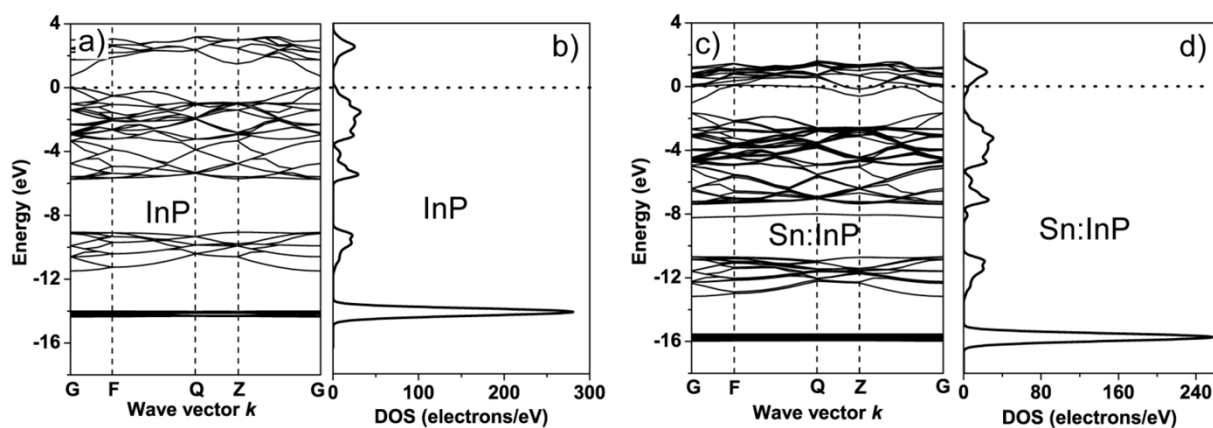

Figure S4. Band and DOS curves of undoped InP and Sn:InP semiconductor materials

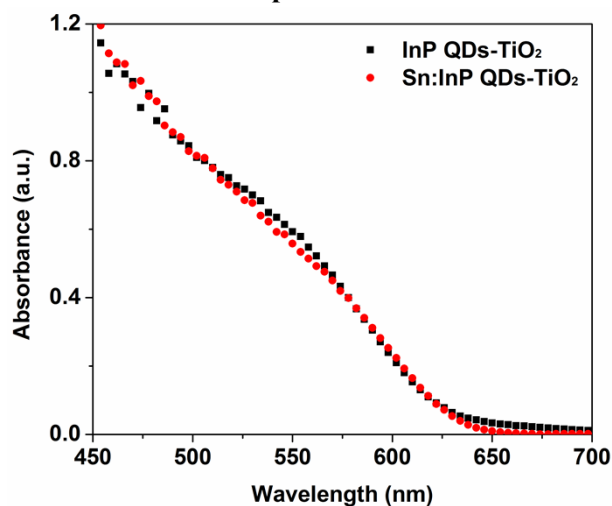

Figure S5. UV-vis spectra of QDs sensitized TiO<sub>2</sub> films

Table S1 ICP-AES analysis results of Sn:InP QDs with different Sn/In ratios

| Samples | Sn/In ratios –ICP-AES | Initial configuration ratios |
|---------|-----------------------|------------------------------|
| Sn:InP  | 0.081                 | 0.15                         |
| Sn:InP  | 0.055                 | 0.10                         |
| Sn:InP  | 0.010                 | 0.05                         |

Table S2 EDS analysis results of Sn:InP QDs (Sn/In=0.1) sensitized TiO<sub>2</sub> films

| Element      | Weight % | Atomic % |
|--------------|----------|----------|
| P <i>Kα</i>  | 3.04     | 5.01     |
| In <i>Lα</i> | 12.29    | 5.46     |
| Sn <i>Lα</i> | 0.87     | 0.38     |
| Ti <i>Kα</i> | 83.79    | 89.16    |

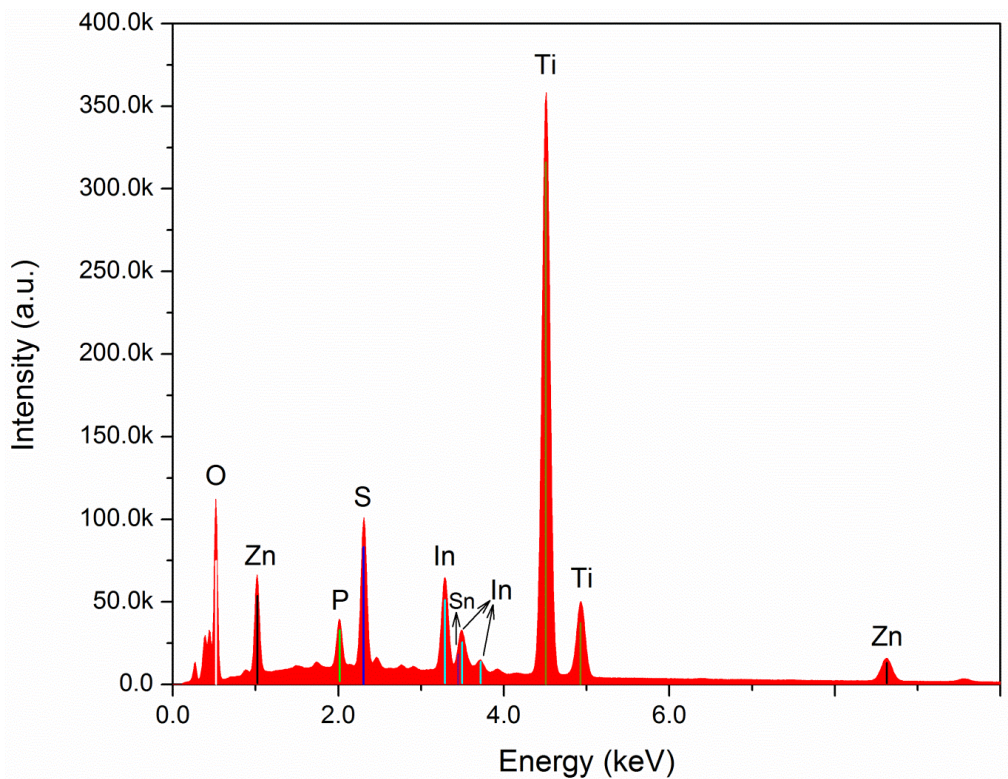

Figure S6. EDS spectrum of the Sn:InP QDs sensitized photoanode

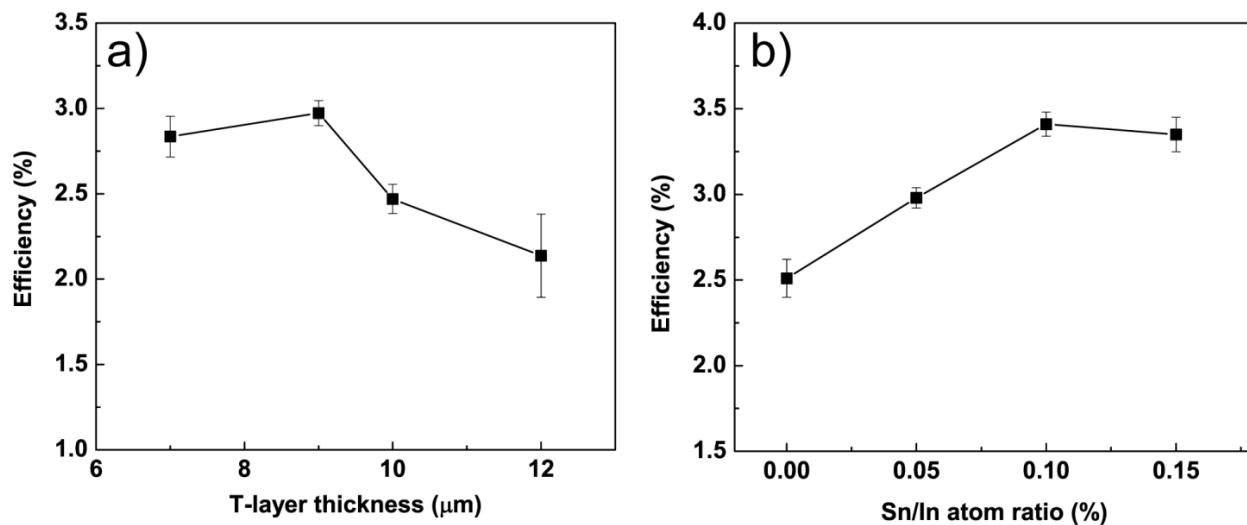

Figure S7. Efficiency of a) different transparent layer thickness of  $\text{TiO}_2$  films and b) Sn/In atom ratios

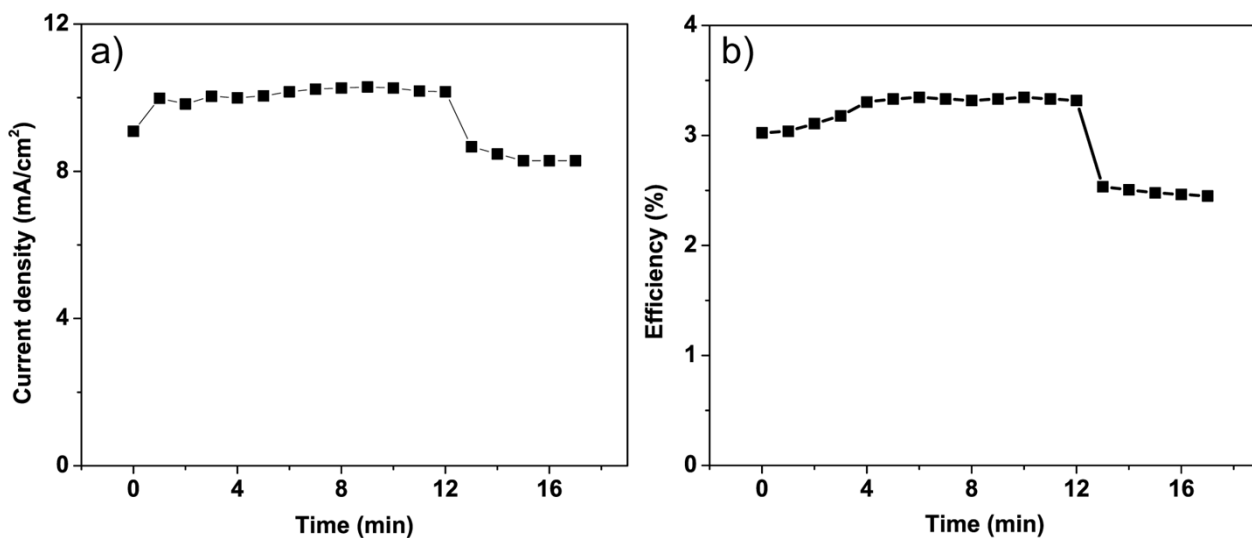

Figure S8. The stability of Sn:InP QDSSCs: a) current density and b) efficiency versus illumination time under continuous illumination.

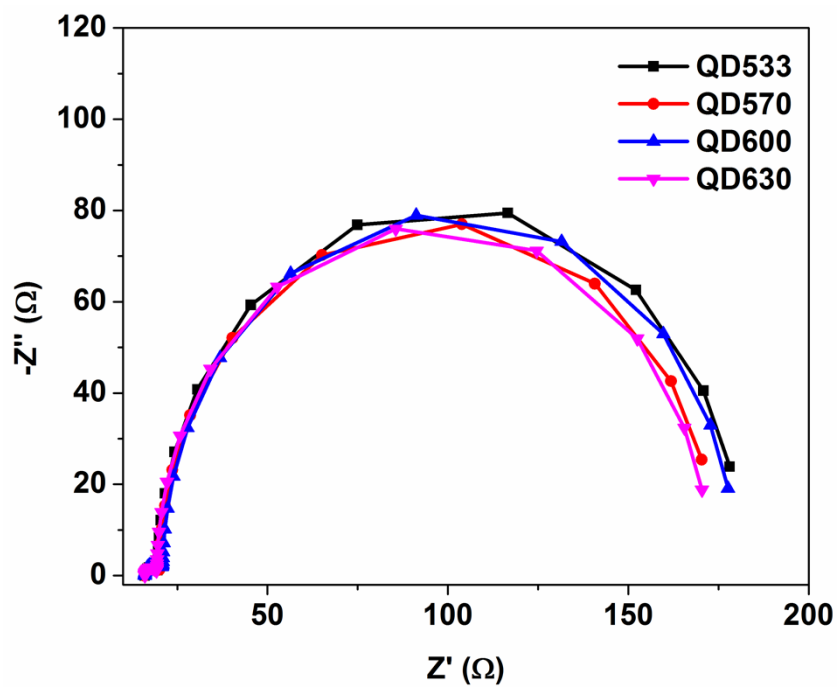

Figure S9. Nyquist curves of Sn:InP QDSSCs with different absorption wavelength.
